# Supplementary material for: Plitidepsin: Mechanisms and Clinical Profile of a Promising Antiviral Agent against COVID-19
Source: MDPI journal article supplement (doi:10.3390/jpm11070668), 2021-07-16
Supplement: s1 [file s1]

## **Supplementary S1. Search strategy.**

### **1.Initial search** (date: March 23, 2021).

#### **A. Plitidepsin-oriented search**

##### **A1. PubMed (164 results)**

(plitidepsin OR "plitidepsin" [Supplementary Concept] OR aplidine OR aplidin OR "dehydrodidemnin B")

##### **A2. Scopus (416 results)**

(plitidepsin OR aplidine OR aplidin OR "dehydrodidemnin B")

##### **A3. CENTRAL (14 results)**

(plitidepsin OR aplidine OR aplidin OR "dehydrodidemnin B")

##### **A4.clinicaltrials.gov (13 results)**

Condition or disease: (-); Other terms: plitidepsin; Country: (-)

#### **B. SARS-CoV-2-oriented search**

##### **A1. PubMed (6 results)**

(plitidepsin OR "plitidepsin" [Supplementary Concept] OR aplidine OR aplidin OR "dehydrodidemnin B") AND ("COVID-19"[Mesh] OR COVID-19 OR "Coronavirus disease 19" OR "SARS-CoV-2"[Mesh] OR SARS-CoV-2 OR "severe acute respiratory syndrome coronavirus 2")

##### **A2. Scopus (2 results)**

(plitidepsin OR aplidine OR aplidin OR "dehydrodidemnin B") AND (COVID-19 OR "Coronavirus disease 19" OR SARS-CoV-2 OR "severe acute respiratory syndrome coronavirus 2")

##### **A3. CENTRAL (1 result)**

(plitidepsin OR aplidine OR aplidin OR "dehydrodidemnin B") AND (COVID-19 OR "Coronavirus disease 19" OR SARS-CoV-2 OR "severe acute respiratory syndrome coronavirus 2")

##### **A4.clinicaltrials.gov (2 results)**

Condition or disease: COVID-19; Other terms: plitidepsin; Country: (-)

##### **A5.medRxiv&bioRxiv (1 relevant paper acquired)**

(plitidepsin OR aplidine OR aplidin OR "dehydrodidemnin B") AND (COVID-19 OR "Coronavirus disease 19" OR SARS-CoV-2 OR "severe acute respiratory syndrome coronavirus 2")

### **2. Update of search**(last search date:April 15, 2021)

## **A. Plitidepsin-oriented search**

### **A1. PubMed (1 new result)**

(plitidepsin OR "plitidepsin" [Supplementary Concept] OR aplidine OR aplidin OR "dehydrodidemnin B")

### **A2. Scopus (3new results)**

(plitidepsin OR aplidine OR aplidin OR "dehydrodidemnin B")

### **A3. CENTRAL (1 new result)**

(plitidepsin OR aplidine OR aplidin OR "dehydrodidemnin B")

### **A4.clinicaltrials.gov (0 new results)**

Condition or disease: (-); Other terms: plitidepsin; Country: (-)

## **B. SARS-CoV-2-oriented search**

### **A1. PubMed (1 new result)**

(plitidepsin OR "plitidepsin" [Supplementary Concept] OR aplidine OR aplidin OR "dehydrodidemnin B") AND ("COVID-19"[Mesh] OR COVID-19 OR "Coronavirus disease 19" OR "SARS-CoV-2"[Mesh] OR SARS-CoV-2 OR "severe acute respiratory syndrome coronavirus 2")

### **A2. Scopus (4 new results)**

(plitidepsin OR aplidine OR aplidin OR "dehydrodidemnin B") AND (COVID-19 OR "Coronavirus disease 19" OR SARS-CoV-2 OR "severe acute respiratory syndrome coronavirus 2")

### **A3. CENTRAL (1 new result)**

(plitidepsin OR aplidine OR aplidin OR "dehydrodidemnin B") AND (COVID-19 OR "Coronavirus disease 19" OR SARS-CoV-2 OR "severe acute respiratory syndrome coronavirus 2")

### **A4.clinicaltrials.gov (0new results)**

Condition or disease: COVID-19; Other terms: plitidepsin; Country: (-)
